# Supplementary material
Source: PubMed Central journal article supplement (PMC7933767)
Supplement: bloodBLD2020008209-suppl1.pdf [file bloodBLD2020008209-suppl1.pdf]

**Isatuximab as monotherapy and combined with dexamethasone in patients with relapsed/refractory multiple myeloma**

**SUPPLEMENTAL DATA**

**Authors:** Meletios Dimopoulos,<sup>1</sup> Sara Bringhen,<sup>2</sup> Pekka Anttila,<sup>3</sup> Marcelo Capra,<sup>4</sup> Michele Cavo,<sup>5</sup> Craig Cole,<sup>6</sup> Cristina Gasparetto,<sup>7</sup> Vania Hungria,<sup>8</sup> Matthew Jenner,<sup>9</sup> Vladimir Vorobyev,<sup>10</sup> Eduardo Yanez Ruiz,<sup>11</sup> Jian Y. Yin,<sup>12</sup> Rao Saleem,<sup>12</sup> Maeva Hellet,<sup>13</sup> Sandrine Macé,<sup>14</sup> Bruno Paiva,<sup>15</sup> Ravi Vij<sup>16</sup>

**Affiliations:** <sup>1</sup>National and Kapodistrian University of Athens, Athens, Greece; <sup>2</sup>Myeloma Unit, Division of Hematology, University of Torino, Azienda Ospedaliero-Universitaria Città della Salute e della Scienza di Torino, Torino, Italy; <sup>3</sup>Division of Hematology, Comprehensive Cancer Center, Helsinki University and Helsinki University Hospital, Helsinki, Finland; <sup>4</sup>Hospital Mãe de Deus, Porto Alegre, Brazil; <sup>5</sup>“Seràgnoli” Institute of Hematology, Sant'Orsola-Malpighi University Hospital, Bologna, Italy; <sup>6</sup>University of Michigan Comprehensive Cancer Center, Ann Arbor, MI, USA; <sup>7</sup>Duke University Medical Center, Durham, NC, USA; <sup>8</sup>Clínica São Germano, São Paulo, Brazil; <sup>9</sup>Department of Haematology, University Hospital Southampton NHS Foundation Trust, Southampton, UK; <sup>10</sup>S.P. Botkin Hospital, Moscow, Russia; <sup>11</sup>Universidad de la Frontera, Temuco, Chile; <sup>12</sup>Sanofi, Bridgewater, MA, USA; <sup>13</sup>Ividata (for Sanofi), Paris, France; <sup>14</sup>Sanofi, Paris, France; <sup>15</sup>Clinica Universidad de Navarra, Centro de Investigación Médica Aplicada (CIMA), Instituto de Investigación Sanitaria de Navarra (IdiSNA), CIBER-ONC number CB16/12/00369, Pamplona, Spain; <sup>16</sup>Washington University, St. Louis, MO, USA

**Corresponding author:** Meletios Dimopoulos

**Email:** mdimop@med.uoa.gr

**Supplemental Table. Serious TEAEs occurring in  $\geq 2\%$  of patients, by system organ class and preferred term (all treated population)**

| System organ class<br>Preferred term                 | Isatuximab (n = 109) |                | Isatuximab + dexamethasone<br>(n = 55) |                |
|------------------------------------------------------|----------------------|----------------|----------------------------------------|----------------|
|                                                      | All grades           | Grade $\geq 3$ | All grades                             | Grade $\geq 3$ |
| <b>Serious TEAE, n (%)</b>                           | 51 (46.8)            | 46 (42.2)      | 25 (45.5)                              | 25 (45.5)      |
| Infections and infestations                          | 23 (21.1)            | 23 (21.1)      | 12 (21.8)                              | 12 (21.8)      |
| Pneumonia                                            | 7 (6.4)              | 7 (6.4)        | 3 (5.5)                                | 3 (5.5)        |
| Bronchitis                                           | 1 (0.9)              | 1 (0.9)        | 3 (5.5)                                | 3 (5.5)        |
| Respiratory tract infection                          | 3 (2.8)              | 3 (2.8)        | 1 (1.8)                                | 1 (1.8)        |
| Sepsis                                               | 3 (2.8)              | 3 (2.8)        | 2 (3.6)                                | 2 (3.6)        |
| Blood and lymphatic system disorders                 | 5 (4.6)              | 4 (3.7)        | 2 (3.6)                                | 2 (3.6)        |
| Anemia                                               | 4 (3.7)              | 3 (2.8)        | 0                                      | 0              |
| Musculoskeletal and connective tissue disorders      | 6 (5.5)              | 4 (3.7)        | 3 (5.5)                                | 3 (5.5)        |
| Pathological fracture                                | 3 (2.8)              | 2 (1.8)        | 1 (1.8)                                | 1 (1.8)        |
| Renal and urinary disorders                          | 4 (3.7)              | 4 (3.7)        | 2 (3.6)                                | 2 (3.6)        |
| Acute kidney injury                                  | 4 (3.7)              | 4 (3.7)        | 2 (3.6)                                | 2 (3.6)        |
| General disorders and administration site conditions | 11 (10.1)            | 9 (8.3)        | 4 (7.3)                                | 3 (5.5)        |
| Disease progression                                  | 7 (6.4)              | 7 (6.4)        | 2 (3.6)                                | 2 (3.6)        |
| Injury, poisoning, and procedural complications      | 8 (7.3)              | 5 (4.6)        | 3 (5.5)                                | 2 (3.6)        |
| Infusion-related reaction                            | 6 (5.5)              | 3 (2.8)        | 2 (3.6)                                | 1 (1.8)        |

TEAE indicates treatment-emergent adverse event.

**Supplemental Figure 1. Swimmer plot of time on treatment in responders (partial response or better).**

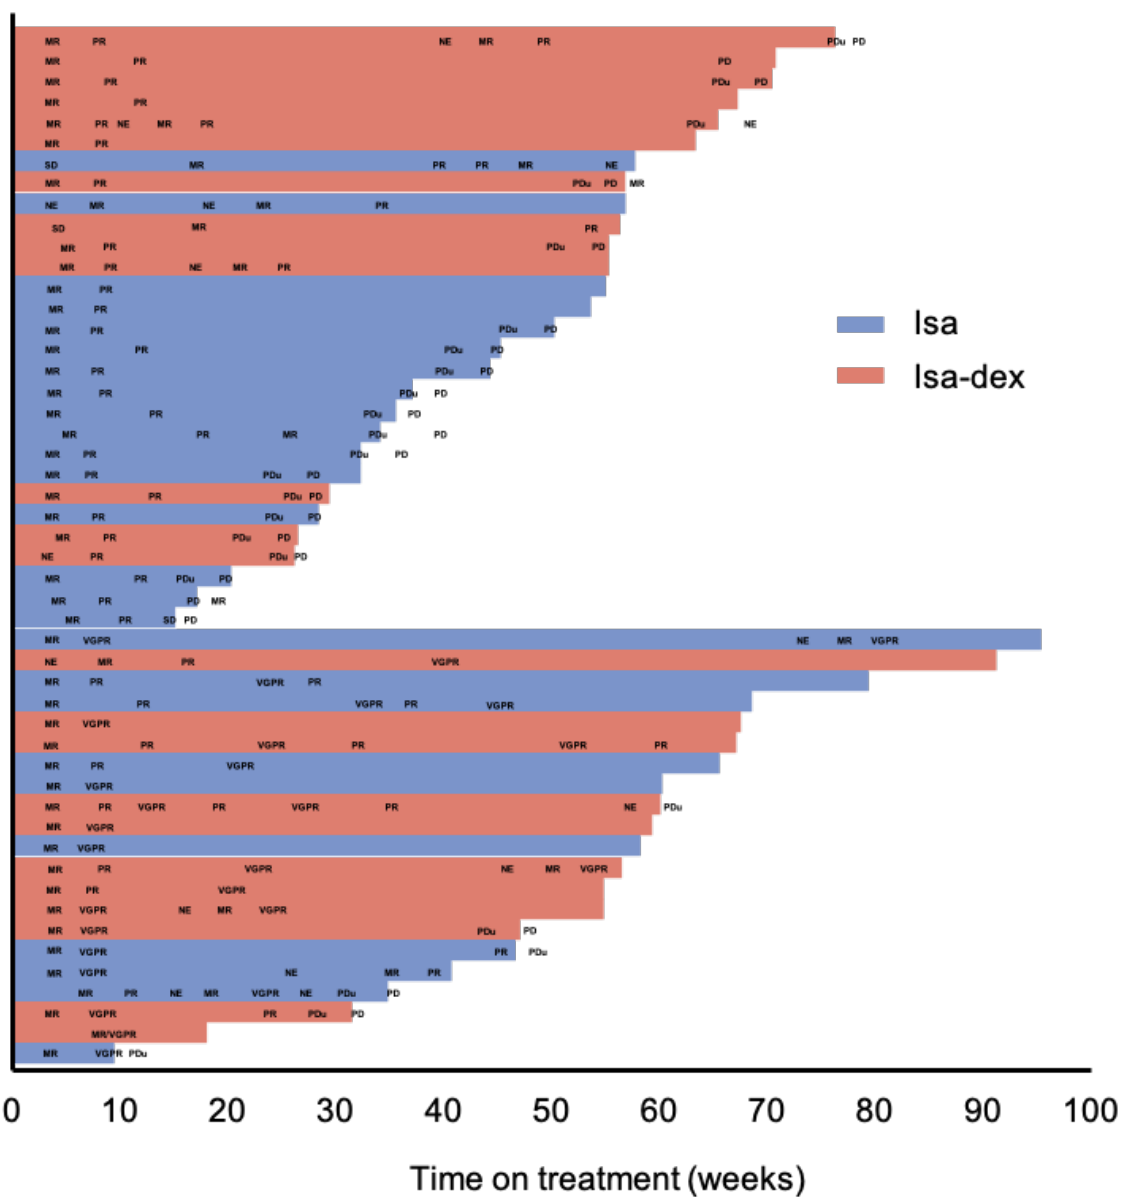

dex indicates dexamethasone; Isa, isatuximab; MR, minimal response; NE, not estimable; PR, partial response; PD, progressive disease; PDU, unconfirmed progressive disease; SD, stable disease; and VGPR, very good partial response.

**Supplemental Figure 2. Immunophenotyping data showing percentage change in cell types from cycle 1 day 1 (baseline) to cycle 3 day 1 with Isa vs Isa-dex based on overall response status.**

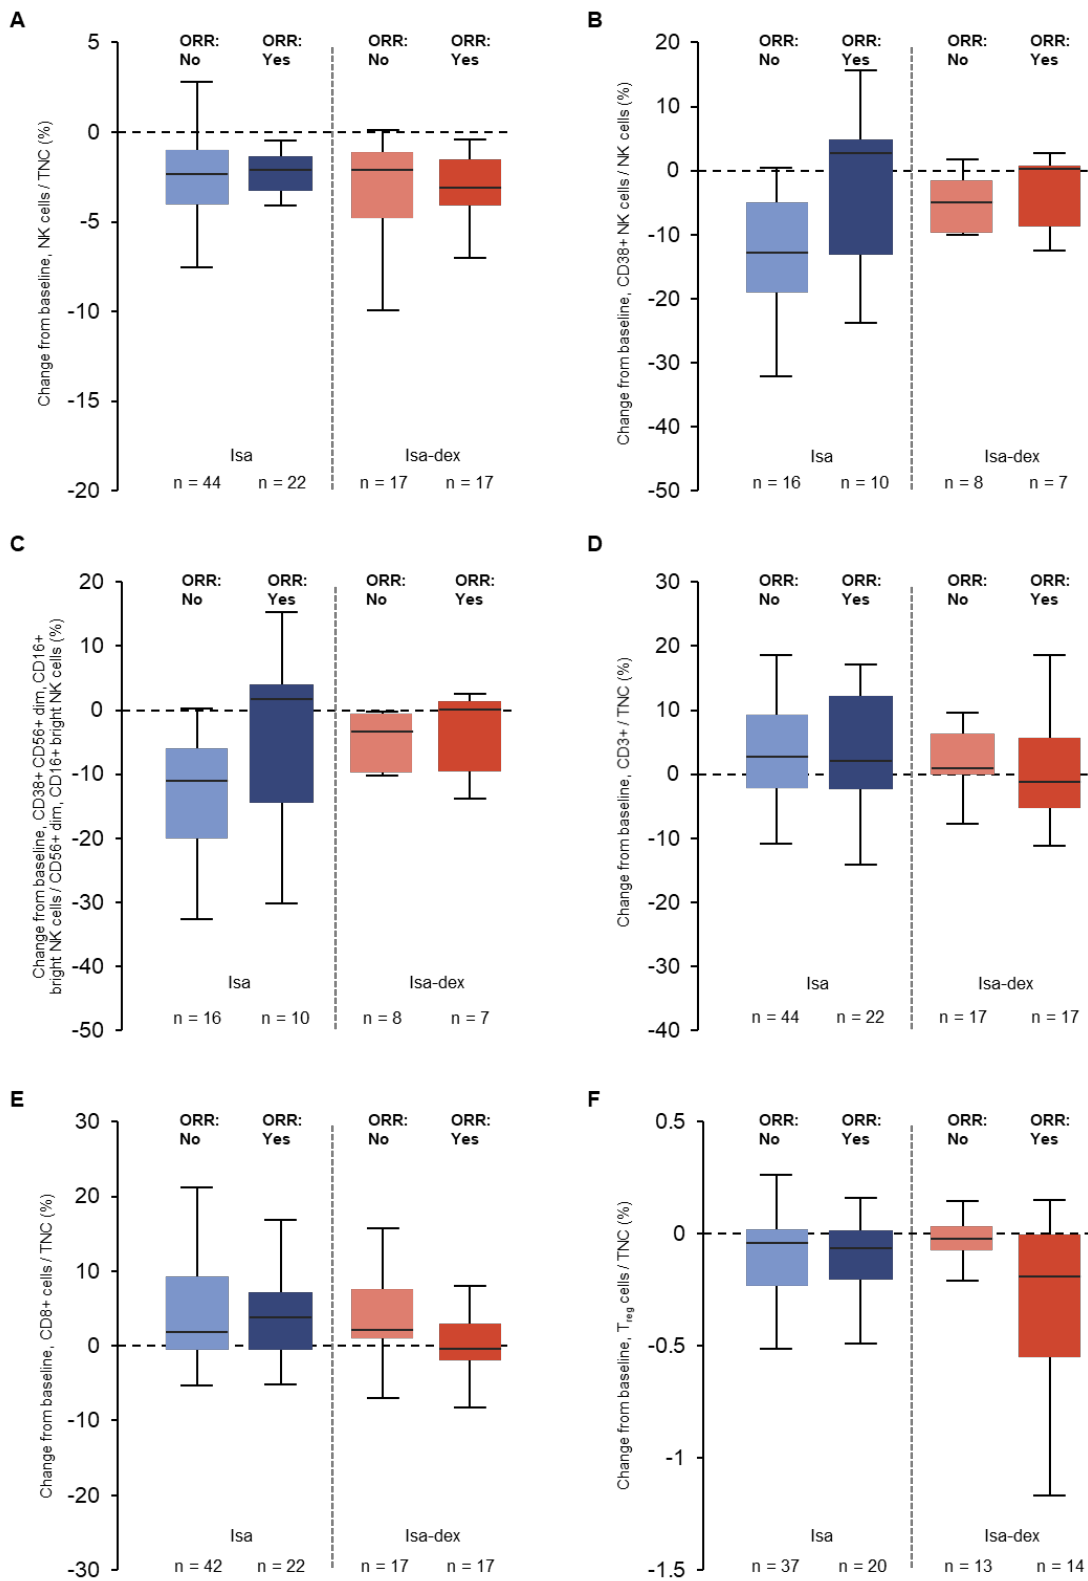

dex indicates dexamethasone; Isa, isatuximab; NK, natural killer; ORR, overall response rate; and T<sub>reg</sub>, regulatory T cell; TNC, total nucleated cells
